# Supplementary material for: Why do people participate in mass anti-malarial administration? Findings from a qualitative study in Nong District, Savannakhet Province, Lao PDR (Laos)
Source: PubMed Central journal article supplement (PMC5761145; doi:10.1186/s12936-017-2158-4), 2018-01-09
Supplement: 12936_2017_2158_MOESM1_ESM.pdf [file 12936_2017_2158_MOESM1_ESM.pdf]

**Selected community engagement activities for Lao TME**

| <b>Table 1: Community Engagement Activities before MDA started</b>                 |                                  |                                        |                      |    |                 |    |
|------------------------------------------------------------------------------------|----------------------------------|----------------------------------------|----------------------|----|-----------------|----|
| Activities                                                                         | Date                             | Other sites                            | Intervention Village |    | Control Village |    |
|                                                                                    |                                  |                                        | PMM                  | TT | OTP             | XT |
| Authority Sensitization                                                            | November 2 <sup>nd</sup> , 2015  | Provincial Malaria Office, Savannakhet |                      |    |                 |    |
| TME Meeting                                                                        | November 3 <sup>rd</sup> , 2015  | LOMWRU Office, Vientiane               |                      |    |                 |    |
| CE Multi-site Meeting                                                              | November 6-7, 2015               | Community Engagement workshop at MORU  |                      |    |                 |    |
| CE book preparation for villagers                                                  | November 9-14, 2015              | LOMWRU office, Vientiane               |                      |    |                 |    |
| District Level Meeting (A general description of TME as a booklet was distributed) | November 23, 2015                | Nong District Health Office            |                      |    |                 |    |
| Baseline survey, Census and GPS                                                    | November 25 to December 18, 2015 |                                        |                      |    |                 |    |
| FGT (Focused Group Training)                                                       | December 22, 2015                |                                        |                      |    |                 |    |
|                                                                                    | December 23, 2015                |                                        |                      |    |                 |    |
| Design of Poster for CE                                                            | December 24, 2015                | At TME office, Nong                    |                      |    |                 |    |
| Design of Poster for CE                                                            | December 25, 2015                | At TME office, Nong                    |                      |    |                 |    |
| Local CE staffs interview to design the CE material                                | December 29, 2015                |                                        |                      |    |                 |    |
|                                                                                    | December 30, 2015                |                                        |                      |    |                 |    |
|                                                                                    | December 31, 2015                |                                        |                      |    |                 |    |
|                                                                                    | January 3 <sup>rd</sup> , 2016   |                                        |                      |    |                 |    |
| Meeting on planning of CE.                                                         | January 4 <sup>th</sup> , 2016   | At Nong District Office                |                      |    |                 |    |

CE=Community Engagement; LOMWRU=Lao-Oxford-Mahosot Hospital Wellcome Trust Research Unit; MORU=Mahidol-Oxford Tropical Medicine Research Unit; TME=Targeted Malaria Elimination

| Activities                                                       | Date                                                        | Other sites          | Intervention Village |    | Control Village |    |
|------------------------------------------------------------------|-------------------------------------------------------------|----------------------|----------------------|----|-----------------|----|
|                                                                  |                                                             |                      | PMM                  | TT | OTP             | XT |
| Trainer's Training (Malaria Guide Book, Poster, Team games)      | January 6 <sup>th</sup> , 2016                              |                      |                      |    |                 |    |
|                                                                  | January 7 <sup>th</sup> , 2016                              |                      |                      |    |                 |    |
|                                                                  | January 8 <sup>th</sup> , 2016                              |                      |                      |    |                 |    |
| Authority Meeting                                                | January 13 <sup>th</sup> , 2016                             | At Nong Meeting Hall |                      |    |                 |    |
| Mass Meeting                                                     | January 14 <sup>th</sup> , 2016                             |                      |                      |    |                 |    |
| Mass Meeting                                                     | January 15 <sup>th</sup> , 2016                             |                      |                      |    |                 |    |
| Devolvement of Responsibilities to Volunteers                    | January 18 <sup>th</sup> , 2016                             |                      |                      |    |                 |    |
| Devolvement of Responsibilities to Volunteers                    | January 19 <sup>th</sup> , 2016                             |                      |                      |    |                 |    |
| Video Preparation                                                | January 20 <sup>th</sup> to January 27 <sup>th</sup> , 2016 | AT Nong TME Office   |                      |    |                 |    |
| Evening CE                                                       | January 28 <sup>th</sup> , 2016                             |                      |                      |    |                 |    |
|                                                                  | January 29 <sup>th</sup> , 2016                             |                      |                      |    |                 |    |
|                                                                  | January 30 <sup>th</sup> , 2016                             |                      |                      |    |                 |    |
| TT Geng and Main                                                 | January 31 <sup>st</sup> , 2016                             |                      |                      |    |                 |    |
| Appok                                                            | February 1, 2016                                            |                      |                      |    |                 |    |
| Consent and House to house sensitization                         | February 9, 2016 to February 19, 2016                       |                      |                      |    |                 |    |
| Meetings with villagers for consent after encountering rejecters | February 24, 2016                                           |                      |                      |    |                 |    |
| Movie preparation on MDA                                         | February 27 to March 11, 2016                               | AT Nong TME Office   |                      |    |                 |    |
| Night CE                                                         | March 16, 2016                                              |                      |                      |    |                 |    |
|                                                                  | March 17, 2016                                              |                      |                      |    |                 |    |
| Mobile health camp                                               | March 18, 2016                                              |                      |                      |    |                 |    |
|                                                                  | March 24, 2016- March 26, 2016                              |                      |                      |    |                 |    |
|                                                                  | March 27, 2016                                              |                      |                      |    |                 |    |
| Bed net and kitchen utensil distribution                         | March 28, 2016                                              |                      |                      |    |                 |    |
|                                                                  | March 29, 2016                                              |                      |                      |    |                 |    |
|                                                                  | March 30, 2016                                              |                      |                      |    |                 |    |
| Night CE                                                         | April 5, 2016                                               |                      |                      |    |                 |    |

CE=Community Engagement; LOMWRU=Lao-Oxford-Mahosot Hospital Wellcome Trust Research Unit; MORU=Mahidol-Oxford Tropical Medicine Research Unit; TME=Targeted Malaria Elimination

| <b>Table 2: Community Engagement activities during and around MDA rounds</b> |                                                              |             |                      |    |                 |    |
|------------------------------------------------------------------------------|--------------------------------------------------------------|-------------|----------------------|----|-----------------|----|
| Activities                                                                   | Date                                                         | Other sites | Intervention Village |    | Control Village |    |
|                                                                              |                                                              |             | PMM                  | TT | OTP             | XT |
| Evening and Night CE during MDA                                              | April 21-April 29, 2016                                      |             |                      |    |                 |    |
| Evening and Night CE during MDA                                              | April 30, 2016                                               |             |                      |    |                 |    |
| House to House visits                                                        | May 2 <sup>nd</sup> 2016                                     |             |                      |    |                 |    |
| Evening and Night CE during MDA                                              | May 3 <sup>rd</sup> , 2016                                   |             |                      |    |                 |    |
| Night CE during Blood collection                                             | May 7-8 <sup>th</sup> , 2016                                 |             |                      |    |                 |    |
| Night CE during Blood collection                                             | May 11-12 <sup>th</sup> , 2016                               |             |                      |    |                 |    |
| Volunteers Meeting, House to House visit and Evening CE for Round 2          | May 22-25, 2016                                              |             |                      |    |                 |    |
| Volunteers Meeting, House to House visit and Evening CE for Round 2          | May 29 to June 1                                             |             |                      |    |                 |    |
| Volunteers Meeting, House to House visit and Evening CE for Round 3          | June 26, 2016                                                |             |                      |    |                 |    |
|                                                                              | June 30 <sup>th</sup> , 2016 and July 4 <sup>th</sup> , 2016 |             |                      |    |                 |    |
| Month 3 Survey                                                               |                                                              |             |                      |    |                 |    |
| Evening CE and Volunteers meeting                                            | July 22, 2016                                                |             |                      |    |                 |    |
| Evening CE and Volunteers meeting                                            | July 25, 2016                                                |             |                      |    |                 |    |
| Evening CE and Volunteers meeting                                            | July 26, 2016                                                |             |                      |    |                 |    |
| Evening CE and Volunteers meeting                                            | July 27, 2016                                                |             |                      |    |                 |    |
| Evening CE and Volunteers meeting                                            | July 30, 2016                                                |             |                      |    |                 |    |
| Night CE                                                                     | August 1, 2016                                               |             |                      |    |                 |    |

CE=Community Engagement; LOMWRU=Lao-Oxford-Mahosot Hospital Wellcome Trust Research Unit; MORU=Mahidol-Oxford Tropical Medicine Research Unit; TME=Targeted Malaria Elimination

| Activities                                                                                                                               | Date           | Other sites | Intervention Village |    | Control Village |    |
|------------------------------------------------------------------------------------------------------------------------------------------|----------------|-------------|----------------------|----|-----------------|----|
|                                                                                                                                          |                |             | PMM                  | TT | OTP             | XT |
| <i>Volunteers, village head, seniors were asked to conduct meeting and house to house counselling at Appok for participation</i>         | August 2, 2016 |             |                      |    |                 |    |
| Night CE                                                                                                                                 | August 4, 2016 |             |                      |    |                 |    |
| Night CE/ <i>Volunteers, village head, seniors were asked to conduct meeting and house to house counselling at PMM for participation</i> | August 5, 2016 |             |                      |    |                 |    |
| Night CE                                                                                                                                 | August 7, 2016 |             |                      |    |                 |    |
| Night CE                                                                                                                                 | August 8, 2016 |             |                      |    |                 |    |
| <i>Volunteers, village head, seniors were asked to conduct meeting and house to house counselling at Tantip for participation</i>        | August 9, 2016 |             |                      |    |                 |    |
